# Supplementary material
Source: MDPI journal article supplement (https://www.mdpi.com/2073-4441/14/16/2534)
Supplement: s1 [file s1]

## Supplementary Materials

### **Impact of log(K<sub>ow</sub>) value on the extraction of antibiotics from river sediments with pressurized liquid extraction**

Amélie Chabilan<sup>1</sup>, Nicolette Landwehr<sup>1</sup>, Harald Horn<sup>1,2\*</sup>, Ewa Borowska<sup>1</sup>

<sup>1</sup> Karlsruhe Institute of Technology, Engler-Bunte Institut, Water Chemistry and Water Technology, Engler-Bunte-Ring 9, 76131 Karlsruhe, Germany

<sup>2</sup> DVGW-Research Center at the Engler-Bunte-Institut, Water Chemistry and Water Technology, Karlsruhe Institute of Technology, Engler-Bunte-Ring 9, 76131, Karlsruhe, Germany

#### **Corresponding author**

harald.horn@kit.edu, Tel.: +49-721-608-4 2580; Fax: +49-721-608--4 6497

## Contents

|                                                                                                                      |    |
|----------------------------------------------------------------------------------------------------------------------|----|
| Text S1 Chemicals and reagents .....                                                                                 | 3  |
| Text S2: Characterization of sediment samples .....                                                                  | 4  |
| Table S1 Properties of ABs used in the study.....                                                                    | 5  |
| Tables S2a to d Characterization of sediment used in the study .....                                                 | 8  |
| Table S3 Conditions used for tandem SPE method .....                                                                 | 9  |
| Table S4 Chromatographic conditions used for quantification of selected antibiotics .....                            | 9  |
| Table S5 Setting of mass spectrometer used for quantification of ABs .....                                           | 10 |
| Table S6 Source parameters used for ABs quantification .....                                                         | 12 |
| Table S7 Surrogates and Internal standards for protocol A to G .....                                                 | 13 |
| Table S8 Classification of ABs related to their log( $K_{ow}$ ) values .....                                         | 14 |
| Figure S1: Recoveries of four different AB classes for four different protocols A, B, C and D (see Table 1)<br>..... | 15 |
| Figure S2 Recoveries for Trimethoprim and Clindamycin for four different methods .....                               | 16 |
| Table S9 Parameters of the method validation.....                                                                    | 18 |
| Table S10 Recoveries for the SPE protocol .....                                                                      | 19 |

## Text S1 Chemicals and reagents

Erythromycin hydrat (96%), roxithromycin (95.3%), chlortetracycline•HCl (81.7%), oxytetracyclin•HCl (98.3%), meclocyclin sulfosalicylat (99%), ciprofloxacin (99.9%), sulfadimethoxine (98.5%), sulfachloropyridazine (pure) and sulfapyridine (99%) were bought at Sigma Aldrich (Germany).

Clarithromycin (98.4%), clindamycin•HCl (pure), tetracycline•HCl (99.1%), doxycycline hyclate, demeclocycline (93.2%), enrofloxacin (98%), ofloxacin (>98.5%), norfloxacin, sulfadiazine (99.8%), sulfamethazine (99.7%), sulfamethoxazole (98%) and trimethoprim (99.8%) were purchased at Alfa Aesar (Germany).

Erythromycin-d3 (pure), roxithromycin-d7 (pure), doxycycline-d3 hyclate (pure), ciprofloxacin-d8 (pure), enrofloxacin-d5 (pure), norfloxacin-d5 (pure), sulfadiazine-d4 (pure), sulfamethazine-d4 (pure), sulfamethoxazole-d4 (pure), sulfapyridine-d4 (pure), clindamycin-d3•HCl (pure) were purchased at TRC Canada.

Clarithromycin-d3 (10 µg/mL), oleandomycin-triacetat (100 µg/mL) were acquired from Neochema (Germany).

Ofloxacin-d3 (100 µg/mL), sulfadimethoxine-d6 (pure), trimethoprim-d3 (pure) and clinafloxacin•HCl (95%) were obtained from LGC Dr. Ehrenhofer (Germany) and Cayman Chemicals (USA), respectively.

Erythromycin-H<sub>2</sub>O was produced in the study according to [61].

Acetonitrile (≥ 99.9%), methanol (≥ 99.9%), hydrochloric acid (37%), phosphoric acid (>85%), HPLC LC-MS grade water, sodium hydroxide (for analysis), formic acid (99%) and Ethylenediaminetetra-acetic acid disodium salt dihydrate (≥99%) were obtained from VWR (Germany). Acetone (≥ 99.8%), ethyl acetate (≥ 99.8%) and ammonium solution (>25%) were purchased from Merck (Darmstadt, Germany), (VWR), Citric acid (≥ 99.5%) was obtained from Carl Roth GmbH + Co. KG (Karlsruhe, Germany).

Ottawa sand (grain size 0.595-0.841 mm) of general-purpose grade was obtained from Fisher Scientific (United Kingdom) and sea sand from Supelco (grain size 0.1-0.315 mm) was purchased from Sigma Aldrich/Merck (Germany).

[61] Mc Ardell, C.S.; Molnar, E.; Suter, M.J.-F.; Giger, W. Occurrence and Fate of Macrolide Antibiotics in Wastewater Treatment Plants and in the Glatt Valley Watershed, Switzerland.

*Environ. Sci. Technol.* **2003**, *37*, 5479–5486, doi:10.1021/es034368i.

## Text S2: Characterization of sediment samples

Soil pH and electrical conductivity was measured in water (ratio 1:2.5). Particle-size distribution of the fine-earth fraction (< 2mm) was determined by a combined wet-sieving and pipette method after oxidation of organic matter with H<sub>2</sub>O<sub>2</sub> and dispersion with 0.1 M sodium pyrophosphate. Total C and N measurements were performed with milled aliquots by elemental analysis via thermal combustion and thermal conductivity detection of CO<sub>2</sub> and N<sub>2</sub> in a He flow (Thermo Scientific, Flash 2000 HT Plus, Bremen, Germany). Total organic carbon (TOC) was calculated as the difference between total C and total inorganic carbon (TIC) determined by acid treatment and measurement of evolved CO<sub>2</sub> in a Scheibler device. Effective cationic exchange capacity and exchangeable cations were determined by extraction with 1 M NH<sub>4</sub>NO<sub>3</sub> and measured by ICP-OES (5100 VDV ICP-OES, Agilent, Waldbronn, Germany). For total element concentrations, we digested the samples with a mix of HNO<sub>3</sub>, HF and H<sub>2</sub>O<sub>2</sub> (4:2:1) in a microwave oven (Mars 6, CEM, Kamp-Lintfort, Germany), complexed excess HF with H<sub>3</sub>BO<sub>3</sub>. Macroelements (Al, Ca, Fe, K, Mg, Na, and P) concentrations were subsequently measured by ICP-OES (5100 VDV ICP-OES, Agilent, Waldbronn, Germany), while microelements (Cd, Cu, Mo, Mn, Pb and Zn) were measured by ICP-MS (7900 MS, Agilent, Waldbronn, Germany). Complete element recovery of total digestions was confirmed with certified reference material (BCR2, Columbia river basalt). All analyses were performed in the Laboratory for Soil Biogeochemistry of the Institute of Geography and Geoecology at the Karlsruhe Institute of Technology, Germany.

Table S1 Properties of ABs used in the study

| AB-Class           | AB<br>(abbreviation)           | Structure                                                                           | M <sub>w</sub> [g/mol] | pK <sub>a</sub>                            | log(K <sub>ow</sub> ) |
|--------------------|--------------------------------|-------------------------------------------------------------------------------------|------------------------|--------------------------------------------|-----------------------|
| SULFONAMIDES (SAs) | Sulfadiazine<br>(SDZ)          | 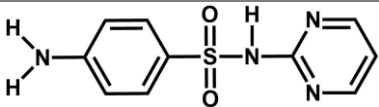   | 250.3                  | 6.36 <sup>[b]</sup>                        | -0.09 <sup>[b]</sup>  |
|                    | Sulfadimethoxine<br>(SDM)      |    | 310.33                 | 2.5 <sup>[c]</sup><br>5.94 <sup>[c]</sup>  | 1.63 <sup>[b]</sup>   |
|                    | Sulfamethazine<br>(SMZ)        |    | 278.33                 | 2.65 <sup>[c]</sup><br>7.24 <sup>[c]</sup> | 0.89 <sup>[b]</sup>   |
|                    | Sulfa-<br>methoxazole<br>(SMX) |    | 252.2                  | 1.6 <sup>[b]</sup><br>5.7 <sup>[b]</sup>   | 0.89 <sup>[b]</sup>   |
|                    | Sulfapyridine<br>(SPD)         |    | 249.3                  | 8.43 <sup>[b]</sup>                        | 0.35 <sup>[b]</sup>   |
| MACROLIDES (MLs)   | Erythromycin<br>(ETM)          |   | 734                    | 8.88 <sup>[b]</sup>                        | 3.06 <sup>[d]</sup>   |
|                    | Roxythromycin<br>(RTM)         |  | 837                    | 9.17 <sup>[d]</sup>                        | 1.7 <sup>[b]</sup>    |

|                        |                        |                                                                                     |       |                                     |                      |
|------------------------|------------------------|-------------------------------------------------------------------------------------|-------|-------------------------------------|----------------------|
| TETRACYCLINES (TCs)    | Clarithromycin (CTM)   | 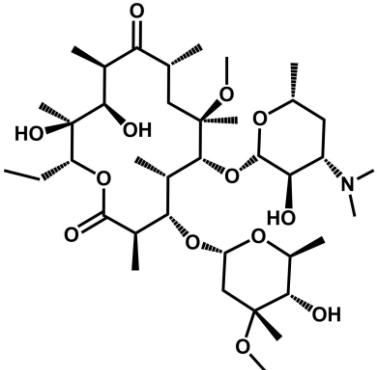   | 748   | 8.99 <sup>[b]</sup>                 | 3.16 <sup>[b]</sup>  |
|                        | Oxytetracyclin (OTC)   |    | 460.4 | 3.27<br>7.32<br>9.11 <sup>[a]</sup> | -0.90 <sup>[a]</sup> |
|                        | Chlortetracyclin (CTC) |    | 478.9 | 3.3<br>7.44<br>9.27 <sup>[a]</sup>  | -0.62 <sup>[a]</sup> |
|                        | Tetracyclin (TCT)      |   | 444.4 | 3.3<br>7.68<br>9.30 <sup>[a]</sup>  | -1.37 <sup>[b]</sup> |
|                        | Doxycyclin (DXC)       |  | 444.4 | 3.50<br>7.70<br>9.70 <sup>[a]</sup> | -0.02 <sup>[a]</sup> |
|                        | Ciprofloxacin (CFC)    |  | 331.3 | 6.09<br>8.74 <sup>[b]</sup>         | 0.28 <sup>[b]</sup>  |
| FLUOROQUINOLONES (FCs) | Enrofloxacin (EFC)     |  | 359.4 | 6.27<br>8.30 <sup>[a]</sup>         | 0.70 <sup>[a]</sup>  |

|        |                          |                                                                                   |       |                             |                      |
|--------|--------------------------|-----------------------------------------------------------------------------------|-------|-----------------------------|----------------------|
| OTHERS | Norfloxacin<br>(NFC)     | 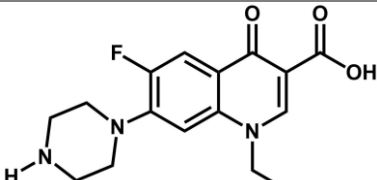 | 319.3 | 6.23<br>8.55 <sup>[a]</sup> | -1.03 <sup>[b]</sup> |
|        | Ofloxacin<br>(OFC)       |  | 347.3 | 5.97<br>8.28 <sup>[a]</sup> | -0.39 <sup>[b]</sup> |
|        | Trimethoprim<br>(TMP)    |  | 290.3 | 7.12 <sup>[c]</sup>         | 0.91 <sup>[b]</sup>  |
|        | Clindamycin•HCl<br>(CDC) |  | 425   | 7.79 <sup>[b]</sup>         | 2.16 <sup>[b]</sup>  |

[a]: Salvia et al., 2015; [17]; [b]: PubChem [62] ; [c]: ChemicalBook, 2021., [63]; [d] MacLeo, 2007 [64]

[17] Salvia, M.-V.; Fieu, M.; Vulliet, E. Determination of Tetracycline and Fluoroquinolone Antibiotics at Trace Levels in Sludge and Soil. *Applied and Environmental Soil Science* **2015**, *2015*, 1–10, doi:10.1155/2015/435741.

[62] PubChem PubChem Available online: <https://pubchem.ncbi.nlm.nih.gov/> (accessed on 18 May 2022).

[63] ChemicalBook---Chemical Search Engine Available online: [https://www.chemicalbook.com/ProductIndex\\_DE.aspx](https://www.chemicalbook.com/ProductIndex_DE.aspx) (accessed on 18 May 2022).

[64] MacLeod, S.L.; McClure, E.L.; Wong, C.S. Laboratory Calibration and Field Deployment of the Polar Organic Chemical Integrative Sampler for Pharmaceuticals and Personal Care Products in Wastewater and Surface Water. *Environmental Toxicology and Chemistry* **2007**, *26*, 2517–2529, doi:10.1897/07-238.1.

## Tables S2a to d Characterization of sediment used in the study

**Table S2a General parameters**

| pH<br>(in H <sub>2</sub> O) | Carbonate<br>as CaCO <sub>3</sub><br>[%] | TIC<br>[%] | TC<br>[%] | TOC<br>[%] | TN<br>[%] |
|-----------------------------|------------------------------------------|------------|-----------|------------|-----------|
| 7.20                        | 4.38                                     | 0.53       | 8.58      | 8.06       | 0.61      |

**Table S2b Particle size analysis**

| Sand [%]       |               |              |           | Silt [%]    |              |             |           | Clay<br>[%] | Error<br>[%] |
|----------------|---------------|--------------|-----------|-------------|--------------|-------------|-----------|-------------|--------------|
| 2000-630<br>μm | 630-200<br>μm | 200-63<br>μm | Sum       | 63-20<br>μm | 20-6.3<br>μm | 6.3-2<br>μm | Sum       | < 2 μm      |              |
| 0.42           | 0.89          | 28.31        | 29.6<br>2 | 25.47       | 13.64        | 9.78        | 48.8<br>9 | 21.49       | -1.54        |

**Table S2c Exchangeable cations, cation exchange capacity and base saturation**

| Al<br>mmolc/<br>kg | Ba<br>mmolc/<br>kg | Ca<br>mmolc/<br>kg | Cu<br>mmolc/<br>kg | Fe<br>mmolc/<br>kg | K<br>mmolc/<br>kg | Mg<br>mmol<br>c/kg | Mn<br>mmolc/k<br>g | Na<br>mmolc/<br>kg | Zn<br>mmolc/<br>kg |
|--------------------|--------------------|--------------------|--------------------|--------------------|-------------------|--------------------|--------------------|--------------------|--------------------|
| 0.31               | 0.87               | 396.91             | 0.01               | 0.06               | 2.63              | 19.92              | 0.27               | 2.48               | 0.02               |

**Cation exchange capacity CEC [mmolc/kg]:** 423.48

**Base saturation [%]:** 99.64

**Table S2d Total element content**

| Al<br>mg/k<br>g | Ca<br>mg/k<br>g | Fe<br>mg/k<br>g | K<br>mg/k<br>g | Mg<br>mg/k<br>g | Na<br>mg/k<br>g | P<br>mg/<br>kg | Cd<br>mg/k<br>g | Cu<br>mg/k<br>g | Mo<br>mg/k<br>g | Mn<br>mg/k<br>g | Pb<br>mg/k<br>g | Zn<br>mg/k<br>g |
|-----------------|-----------------|-----------------|----------------|-----------------|-----------------|----------------|-----------------|-----------------|-----------------|-----------------|-----------------|-----------------|
| 5209<br>3       | 2727<br>8       | 2123<br>3       | 1801<br>6      | 7526            | 6819            | 122<br>9       | 1.4             | 99              | 0.7             | 557             | 79              | 551             |



Table S3 Conditions used for tandem SPE method

|              | HLB                              | MCX                                         |
|--------------|----------------------------------|---------------------------------------------|
| Conditioning | 5 mL Methanol                    | 2.5 mL Methanol                             |
|              | 5 mL Acetonitrile                | 2.5 mL Acetonitrile                         |
|              | 5 mL Ultrapure water             | 2.5 mL 5 % NH <sub>4</sub> OH in methanol   |
|              | 2 x 5 mL ultrapure water at pH 2 | 2.5 mL Ultrapure water                      |
|              |                                  | 2.5 mL 0.1 mol/L HCl                        |
|              |                                  | 2 x 2.5 mL ultrapure water at pH 2          |
| Washing      | 5 mL Ultrapure water             | 2.5 mL 0.1 M HCl                            |
| Elution      | 5 mL Methanol                    | 2.5 mL Methanol                             |
|              | 5 mL Acetonitrile                | 5 mL Acetonitrile                           |
|              |                                  | 2.5 mL Methanol with 5 % NH <sub>4</sub> OH |

Table S4 Chromatographic conditions used for quantification of selected antibiotics

| Eluent A:         | 0.05 % Formic acid in HPLC water   |       |
|-------------------|------------------------------------|-------|
| Eluent B:         | 0.05 % Formic acid in acetonitrile |       |
| Flow:             | 300 µL/min                         |       |
| Injection volume: | 50 µL                              |       |
| Post-time         | 2.0 min                            |       |
| Time [min]        | A [%]                              | B [%] |
| 0                 | 95                                 | 5     |
| 0.2               | 95                                 | 5     |
| 4.2               | 5                                  | 95    |
| 6.0               | 5                                  | 95    |

Table S5 Setting of mass spectrometer used for quantification of ABs

| AB class         | AB                         | Retention time (min) | Precursor ion (m/z) | Quantifier (m/z) | Qualifier (m/z) | Fragmentor (V) | Collision energie (V) |
|------------------|----------------------------|----------------------|---------------------|------------------|-----------------|----------------|-----------------------|
| Sulfonamides     | Sulfadiazine               | 2.50                 | 251.1               | 155.9            | 108.0           | 110            | 12                    |
|                  | <i>Sulfadiazine-d4</i>     | 2.50                 | 255.1               | 159.9            | 112.0           | 120            | 16                    |
|                  | Sulfamethoxazole           | 3.33                 | 254.1               | 155.9            | 92.0            | 105            | 16                    |
|                  | <i>Sulfamethoxazole-d4</i> | 3.32                 | 258.1               | 159.9            | 96.0            | 90             | 12                    |
|                  | Sulfapyridine              | 2.70                 | 250.1               | 155.9            | 108.0           | 120            | 16                    |
|                  | <i>Sulfapyridine-d4</i>    | 2.70                 | 254.1               | 159.9            | 112.0           | 115            | 16                    |
|                  | Sulfadimethoxine           | 3.60                 | 311.1               | 155.9            | 92.0            | 145            | 20                    |
|                  | <i>Sulfadimethoxine-d6</i> | 3.64                 | 317.1               | 162              | 65              | 145            | 24                    |
|                  | Sulfamethazine             | 3.01                 | 279.1               | 185.9            | 148.9           | 120            | 16                    |
|                  | <i>Sulfamethazine-d4</i>   | 3.01                 | 283.1               | 185.9            | 124             | 125            | 16                    |
|                  | Sulfachloropyridazine      | 3.23                 | 285.0               | 155.9            | 92.0            | 105            | 12                    |
| Fluoroquinolones | Ciprofloxacin              | 2.75                 | 332.1               | 314.1            | 288.1           | 120            | 20                    |
|                  | <i>Ciprofloxacin-d8</i>    | 2.75                 | 340.2               | 322.2            | 296.3           | 130            | 20                    |
|                  | Ofloxacin                  | 2.76                 | 362.2               | 344.1            | 318.1           | 150            | 20                    |
|                  | <i>Ofloxacin-d3</i>        | 2.76                 | 365.2               | 321.1            | 261.0           | 150            | 20                    |
|                  | Norfloxacin                | 2.82                 | 320.1               | 302.1            | 276.0           | 145            | 20                    |
|                  | <i>Norfloxacin-d5</i>      | 2.85                 | 325.2               | 307.1            | 281.1           | 145            | 20                    |
|                  | Enrofloxacin               | 2.91                 | 360.2               | 342.1            | 316.1           | 155            | 20                    |
|                  | <i>Enrofloxacin-d5</i>     | 2.82                 | 365.2               | 321.2            | 245             | 145            | 20                    |
|                  | <i>Clinafloxacin</i>       | 2.97                 | 366.1               | 348.1            | 305.1           | 135            | 20                    |
| Tetracyclines    | Tetracyclin                | 2.86                 | 445.2               | 410.1            | 153.9           | 125            | 20                    |
|                  | Oxytetracyclin             | 2.76                 | 461.2               | 426.1            | 200.9           | 130            | 20                    |
|                  | Chlortetracyclin           | 2.96                 | 479.1               | 462.0            | 444.0           | 140            | 20                    |
|                  | Doxycyclin                 | 3.19                 | 445.2               | 428.1            | 267.0           | 130            | 16                    |
|                  | <i>Doxycyclin-d3</i>       | 3.20                 | 448.2               | 431.1            | 154.9           | 145            | 20                    |
|                  | <i>Meclocycline</i>        | 3.37                 | 477.1               | 460              | 234.9           | 140            | 16                    |
|                  | Demeclocycline             | 3.00                 | 465.1               | 448              | 430             | 145            | 16                    |

|            |                               |      |       |       |       |     |    |
|------------|-------------------------------|------|-------|-------|-------|-----|----|
| Macrolides | Erythromycin                  | 3.05 | 734.5 | 576.3 | 158.0 | 175 | 20 |
|            | Erythromycin-H <sub>2</sub> O | 3.69 | 716.5 | 558.3 | 158.0 | 165 | 12 |
|            | <i>Erythromycin-d3</i>        | 3.49 | 737.5 | 579.4 | 161.0 | 170 | 20 |
|            | Roxithromycin                 | 3.70 | 837.5 | 679.4 | 158.0 | 175 | 20 |
|            | <i>Roxithromycin-d7</i>       | 3.69 | 844.6 | 686.5 | 158.0 | 185 | 20 |
|            | Clarithromycin                | 3.77 | 748.5 | 590.3 | 158.0 | 175 | 16 |
|            | Clarithromycin-d3             | 3.76 | 751.5 | 593.3 | 161.0 | 175 | 20 |
|            | <i>Oleandomycin-triacetat</i> | 3.88 | 814.5 | 200   | 98.1  | 185 | 24 |
| Others     | Trimethoprim                  | 2.74 | 291.2 | 261.0 | 230.0 | 150 | 28 |
|            | <i>Trimethoprim-d3</i>        |      |       |       |       |     |    |
|            | Clindamycin                   | 3.17 | 425.2 | 126.0 | 69.7  | 155 | 28 |
|            | <i>Clindamycin-d3</i>         | 3.10 | 428.2 | 129   | 45.1  | 160 | 32 |

Table S6 Source parameters used for ABs quantification

| Source parameter       | Value          | Unit           |
|------------------------|----------------|----------------|
| Gas temperature        | 230            | <sup>0</sup> C |
| Gas flow               | 8              | L/min          |
| Nebulizer              | 40             | psi            |
| Sheath gas temperature | 400            | <sup>0</sup> C |
| Capillary voltage      | Positive: 3500 | v              |
|                        | Negative: 3500 | v              |

Table S7 Surrogates and Internal standards for protocol A to G

| Class            | Name                          | Abb.                 | LOD<br>(ng/L) | LOQ<br>(ng/L) | Internal standards  |        | Surrogates             |
|------------------|-------------------------------|----------------------|---------------|---------------|---------------------|--------|------------------------|
| Fluoroquinolones | Ciprofloxacin                 | CFC                  | 5             | 10            | Ciprofloxacin-d8    | CFC-d8 | Cilnafloxacin          |
|                  | <i>Clinafloxacin</i>          | CLF                  | 100           | 250           | Enrofloxacin-d5     |        |                        |
|                  | Enrofloxacin                  | EFC                  | 25            | 50            | Enrofloxacin-d5     | EFC-d5 |                        |
|                  | Norfloxacin                   | NFC                  | 100           | 250           | Norfloxacin-d5      | NFC-d5 |                        |
|                  | Ofloxacin                     | OFC                  | 50            | 75            | Ofloxacin-d3        | OFC-d3 |                        |
| Macrolides       | Clarithromycin                | CTM                  | 10            | 25            | Clarithromycin-d3   | CTM-d3 | Oleandomycin-triacetat |
|                  | Erythromycin                  | ETM                  | 10            | 25            | Erythromycin-d3     | ETM-d3 |                        |
|                  | Erythromycin-H <sub>2</sub> O | ETM-H <sub>2</sub> O | 10            | 25            | Erythromycin-d3     | ETM-d3 |                        |
|                  | Roxithromycin                 | RTM                  | 10            | 25            | Roxithromycin-d7    | RTM-d7 |                        |
|                  | Oleandomycin-triacetat        | ODL                  | 10            | 25            | Clarithromycin-d3   |        |                        |
| Sulfonamides     | Sulfadiazine                  | SDZ                  | 2.5           | 5             | Sulfadiazined-4     | SDZ-d4 | Sulfachloropyridazine  |
|                  | Sulfadimethoxine              | SDM                  | 2-5           | 5             | Sulfadimethoxine-d6 | SDM-d6 |                        |
|                  | Sulfamethazine                | SMZ                  | 5             | 7.5           | Sulfamethazine-d4   | SMZ-d4 |                        |
|                  | Sulfamethoxazole              | SMX                  | 5             | 7.5           | Sulfamethoxazole-d4 | SMX-d4 |                        |
|                  | Sulfapyridine                 | SPD                  | 2.5           | 5             | Sulfapyridine-d4    | SPD-d4 |                        |
|                  | Sulfachloropyridazine         | SCP                  | 5             | 7.5           | Sulfadiazine-d4     |        |                        |
| Tetracyclines    | Chlortetracycline             | CTC                  | 50            | 75            | Demeclocycline      | DMC    | Meclocycline           |
|                  | Doxycycline                   | DCX                  | 50            | 75            | Doxycycline-d3      | DCX-d3 |                        |
|                  | Oxytetracycline               | OTC                  | 50            | 75            | Demeclocycline      | DMC    |                        |
|                  | Meclocycline                  | MCC                  | 10            | 50            | Demeclocycline      |        |                        |
|                  | Tetracycline                  | TCT                  | 50            | 75            | Demeclocycline      | DMC    |                        |
| Others           | Clindamycin                   | CDC                  | 2.5           | 5             | Clindamycin-d3      | CDC-d3 | Sulfachloropyridazine  |
|                  | Trimethoprim                  | TMP                  | 5             | 7.5           | Trimethoprim-d3     | TMP-d3 | Sulfachloropyridazine  |

Table S8 Classification of ABs related to their  $\log(K_{ow})$  values

|                                       | AB name           | $\log(K_{ow})$ |
|---------------------------------------|-------------------|----------------|
| Group1:<br>$\log(K_{ow}) \leq -1$     | Norfloxacin       | -1.03          |
|                                       | Tetracycline      | -1.37          |
| Group 2<br>$-1 < \log(K_{ow}) \leq 0$ | Doxycycline       | -0.02          |
|                                       | Sulfadiazine      | -0.09          |
|                                       | Ofloxacin         | -0.39          |
|                                       | Chlortetracycline | -0.62          |
|                                       | Oxytetracycline   | -0.90          |
|                                       | Trimethoprim      | 0.91           |
| Group 3<br>$0 < \log(K_{ow}) \leq 1$  | Sulfamethoxazole  | 0.89           |
|                                       | Sulfamethazine    | 0.89           |
|                                       | Enrofloxacin      | 0.70           |
|                                       | Sulfapyridine     | 0.35           |
|                                       | Ciprofloxacin     | 0.28           |
|                                       | Demeclocycline    | 0.20           |
| Group 4<br>$\log(K_{ow}) > 1$         | Sulfadimethoxine  | 1.63           |
|                                       | Roxithromycin     | 1.7            |
|                                       | Clindamycin       | 2.16           |
|                                       | Erythromycin      | 3.06           |
|                                       | Clarithromycin    | 3.16           |

Figure S1: Recoveries of four different AB classes for four different protocols A, B, C and D (see Table 1)

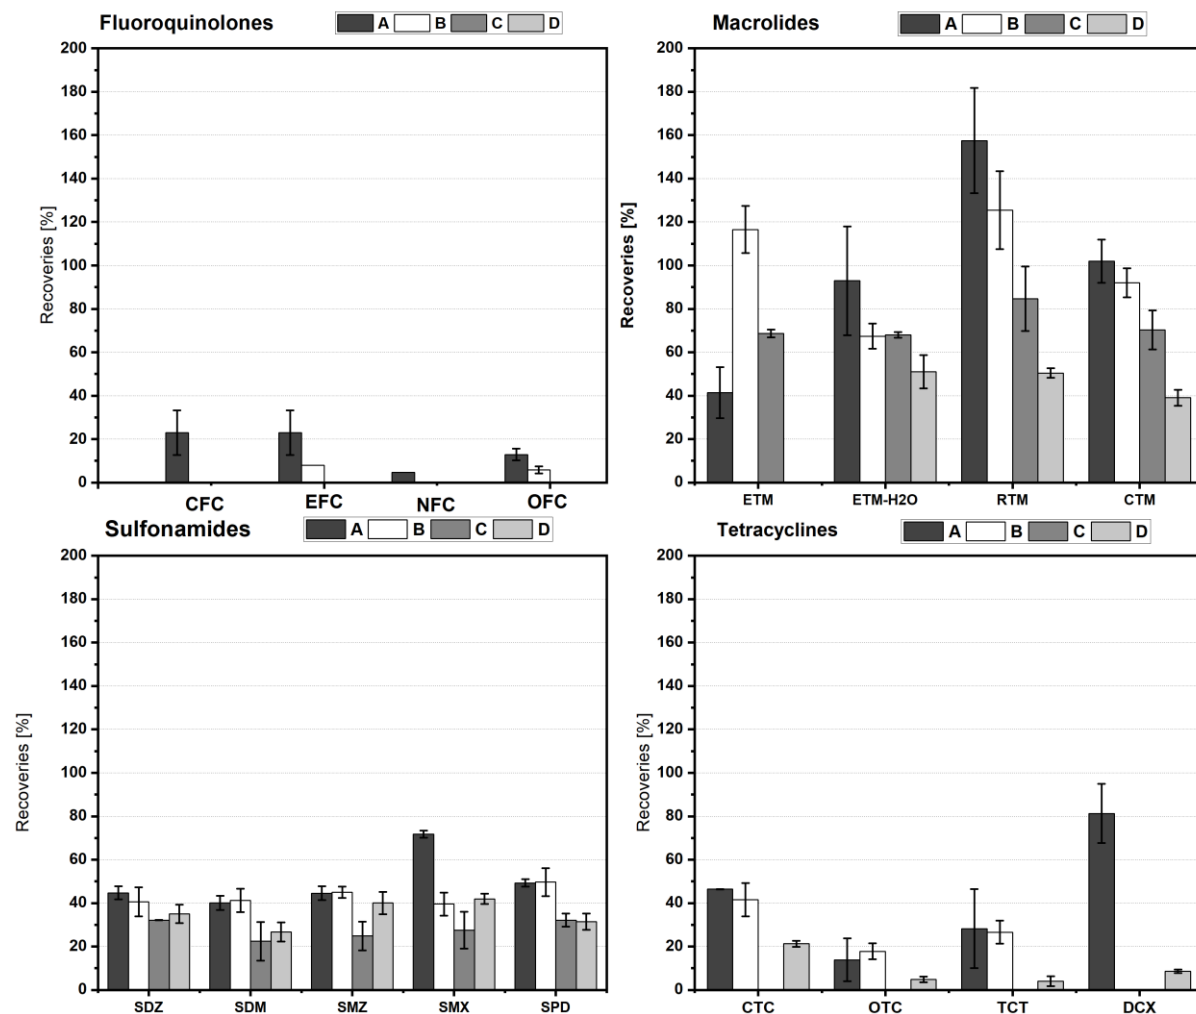

Methods modified after: Golet et al. (A) [37], Salvia et al. (B) [17], Kerrigan et al. (C) [35] and Senta et al. (D) [36]. Ciprofloxacin (CFC), Enrofloxacin (EFC), Norfloxacin (NFC), Ofloxacin (OFC), Erythromycin (ETM), Erythromycin-H<sub>2</sub>O (ETM-H<sub>2</sub>O), Roxithromycin (RTM), Clarithromycin (CTM), Sulfadiazine (SDZ), Sulfadimethoxine (SDM), Sulfamethazine (SMZ), Sulfamethoxazole (SMX), Sulfapyridine (SPD), Chlortetracyclin (CTC), Oxytetracyclin (OTC), Tetracyclin (TCT), Doxycycline (DCX) for which in protocol B and C signal to noise ratio was below 10, which made the quantification impossible

[17] Salvia, M.-V.; Fieu, M.; Vulliet, E. Determination of Tetracycline and Fluoroquinolone Antibiotics at Trace Levels in Sludge and Soil. *Applied and Environmental Soil Science* **2015**, *2015*, 1–10, doi:10.1155/2015/435741.

- [37] Golet, E.M.; Strehler, A.; Alder, A.C.; Giger, W. Determination of Fluoroquinolone Antibacterial Agents in Sewage Sludge and Sludge-Treated Soil Using Accelerated Solvent Extraction Followed by Solid-Phase Extraction. *Anal. Chem.* **2002**, *74*, 5455–5462, doi:10.1021/ac025762m.
- [35] Kerrigan, J.F.; Sandberg, K.D.; Engstrom, D.R.; LaPara, T.M.; Arnold, W.A. Sedimentary Record of Antibiotic Accumulation in Minnesota Lakes. *Science of The Total Environment* **2018**, *621*, 970–979, doi:10.1016/j.scitotenv.2017.10.130.
- [36] Senta, I.; Terzic, S.; Ahel, M. Analysis and Occurrence of Macrolide Residues in Stream Sediments and Underlying Alluvial Aquifer Downstream from a Pharmaceutical Plant. *Environmental Pollution* **2021**, *273*, 116433, doi:10.1016/j.envpol.2021.116433.

Figure S2 Recoveries for Trimethoprim and Clindamycin for four different methods

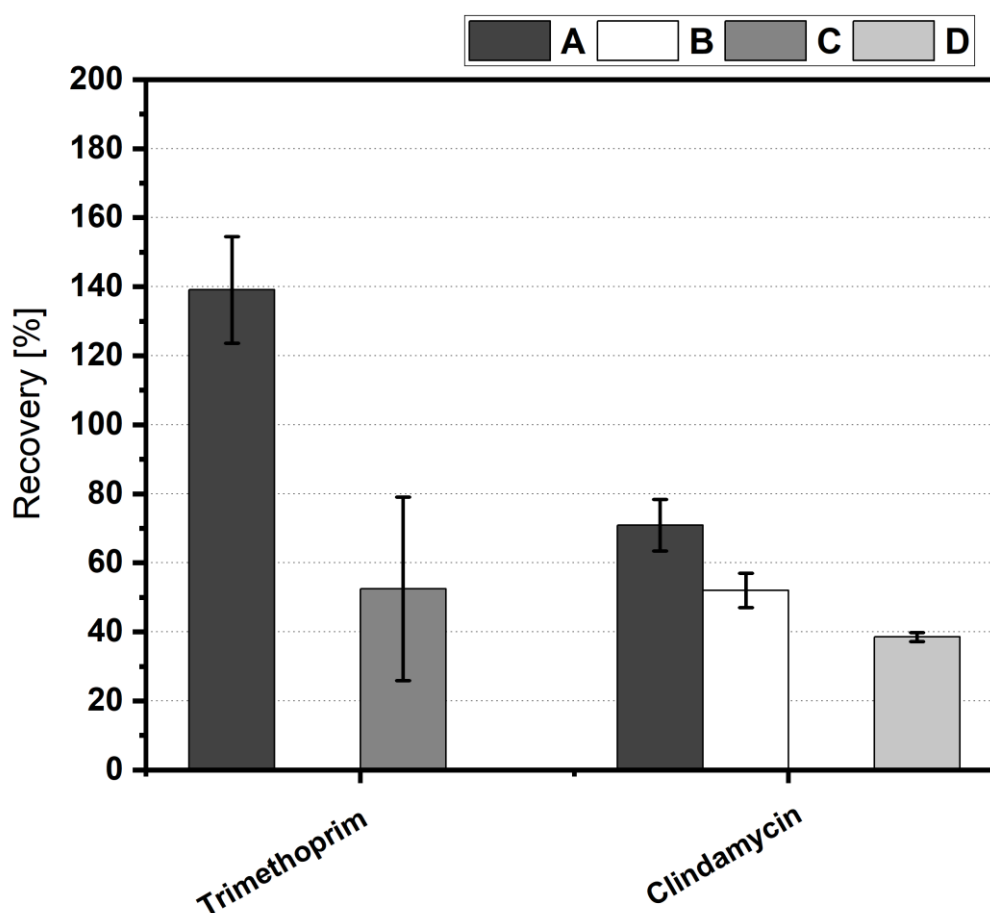

Methods modified after: Golet et al. (A) [37], Salvia et al. (B) [17], Kerrigan et al. (C) [35] and Senta et al. (D) [36]. When no column showed quantification wasn't possible because out side calibration range.



- [17] Salvia, M.-V.; Fieu, M.; Vulliet, E. Determination of Tetracycline and Fluoroquinolone Antibiotics at Trace Levels in Sludge and Soil. *Applied and Environmental Soil Science* **2015**, *2015*, 1–10, doi:10.1155/2015/435741.
- [37] Golet, E.M.; Strehler, A.; Alder, A.C.; Giger, W. Determination of Fluoroquinolone Antibacterial Agents in Sewage Sludge and Sludge-Treated Soil Using Accelerated Solvent Extraction Followed by Solid-Phase Extraction. *Anal. Chem.* **2002**, *74*, 5455–5462, doi:10.1021/ac025762m.
- [35] Kerrigan, J.F.; Sandberg, K.D.; Engstrom, D.R.; LaPara, T.M.; Arnold, W.A. Sedimentary Record of Antibiotic Accumulation in Minnesota Lakes. *Science of The Total Environment* **2018**, *621*, 970–979, doi:10.1016/j.scitotenv.2017.10.130.
- [36] Senta, I.; Terzic, S.; Ahel, M. Analysis and Occurrence of Macrolide Residues in Stream Sediments and Underlying Alluvial Aquifer Downstream from a Pharmaceutical Plant. *Environmental Pollution* **2021**, *273*, 116433, doi:10.1016/j.envpol.2021.116433.

Table S9 Parameters of the method validation

| Class            | Name                          | Accuracy<br>[%] (50<br>µg/kg) | Accuracy<br>[%] (100<br>µg/kg) | Repeatability<br>(50 µg/kg) | Repeatability<br>(100 µg/kg) | Coefficient<br>of variation<br>[%]<br>(50 µg/kg) | Coefficient<br>of variation<br>[%]<br>(100 µg/kg) | Method<br>detection<br>limit<br>(µg/kg) | Method<br>quantification<br>limit (µg/kg) | Matrix<br>effect |
|------------------|-------------------------------|-------------------------------|--------------------------------|-----------------------------|------------------------------|--------------------------------------------------|---------------------------------------------------|-----------------------------------------|-------------------------------------------|------------------|
| Fluoroquinolones | Ciprofloxacin                 | 1.9                           | 0.8                            | 1.1                         | 0.1                          | 61                                               | 15                                                | 0.2                                     | 0.4                                       | 0.25             |
|                  | Clinafloxacin                 | -                             | -                              | -                           | -                            | -                                                | -                                                 | 58                                      | 144.9                                     | 0.01             |
|                  | Enrofloxacin                  | 1.8                           | 1.4                            | 0.2                         | 0.3                          | 11                                               | 20                                                | 2.9                                     | 5.7                                       | 0.08             |
|                  | Norfloxacin                   | 1.1                           | 1.1                            | -                           | 0.2                          | -                                                | 16                                                | 3.4                                     | 8.5                                       | 0.42             |
|                  | Ofloxacin                     | 0.2                           | 0.3                            | 0.1                         | 0.3                          | 55                                               | 80                                                | 4.9                                     | 7.3                                       | 0.08             |
| Macrolides       | Clarithromycin                | 25.9                          | 14                             | 8.9                         | 5.2                          | 34                                               | 38                                                | 0.2                                     | 0.5                                       | 0.40             |
|                  | Erythromycin                  | 14.3                          | 11                             | 2.6                         | -                            | 18                                               | -                                                 | 0.1                                     | 0.3                                       | 0.95             |
|                  | Erythromycin-H <sub>2</sub> O | 30.9                          | 31                             | 8.8                         | 5.3                          | 29                                               | 17                                                | 0.6                                     | 1.5                                       | 0.20             |
|                  | Olendomycin-<br>triacetat     | 3.8                           | 3.3                            | 2.1                         | 1.3                          | 56                                               | 38                                                | 0.2                                     | 0.4                                       | 0.49             |
|                  | Roxithromycin                 | 29.2                          | 15                             | 8.0                         | 7.0                          | 27                                               | 48                                                | 0.1                                     | 0.3                                       | 0.66             |
| Sulfonamides     | Sulfachloropyridazine         | 8.7                           | 18.8                           | 2.3                         | 3.4                          | 27                                               | 18                                                | 0.7                                     | 1.1                                       | 0.07             |
|                  | Sulfadiazine                  | 21.3                          | 22                             | 3.7                         | 0.9                          | 17                                               | 4                                                 | 0.3                                     | 0.6                                       | 0.09             |
|                  | Sulfadimethoxine              | 13.5                          | 19                             | 2.4                         | 2.5                          | 18                                               | 14                                                | 0.6                                     | 1.1                                       | 0.03             |
|                  | Sulfamethazine                | 28.2                          | 33                             | 4.8                         | 2.4                          | 17                                               | 7                                                 | 0.5                                     | 0.8                                       | 0.07             |
|                  | Sulfamethoxazole              | 16.1                          | 21                             | 2.8                         | 2.2                          | 17                                               | 11                                                | 0.6                                     | 0.9                                       | 0.04             |
|                  | Sulfapyridine                 | 22.3                          | 27                             | 3.2                         | 2.1                          | 14                                               | 8                                                 | 0.3                                     | 0.5                                       | 0.07             |
| Tetracyclines    | Chlortetracycline             | -                             | -                              | -                           | -                            | -                                                | -                                                 | 0.6                                     | 1.0                                       | 0.77             |
|                  | Doxycycline                   | 26.3                          | -                              | 5.1                         | -                            | 19                                               | -                                                 | 1.6                                     | 2.4                                       | 0.26             |
|                  | Meclocycline                  | 4.3                           | 5                              | 1.4                         | 1.7                          | 32                                               | 35                                                | 13.6                                    | 27.1                                      | 0.12             |
|                  | Oxytetracycline               | 7.2                           | 5                              | 1.8                         | 2.4                          | 25                                               | 44                                                | 0.7                                     | 1.0                                       | 0.83             |
|                  | Tetracycline                  | 10.6                          | 4                              | 3.3                         | 1.3                          | 32                                               | 32                                                | 0.7                                     | 1.0                                       | 0.83             |
| Others           | Clindamycin                   | 48.8                          | 45                             | 10.4                        | 8.1                          | 21                                               | -                                                 | 0.1                                     | 0.1                                       | 0.38             |
|                  | Trimethoprim                  | 64.8                          | 59                             | 12.8                        | 9.6                          | 20                                               | 16                                                | 0.1                                     | 0.2                                       | 0.29             |

# Table S10 Recoveries for the SPE protocol

PLE matrix blanks extracts were spiked with AB stock solution cartridges order were HLB on top of MCX for loading and elution of the sample, replicates is two.

|                         |                       |         | HLB-MCX  |                     |
|-------------------------|-----------------------|---------|----------|---------------------|
|                         |                       |         | average  | Standard derivation |
| <b>Sulfonamides</b>     | Sulfadiazine          | SDZ     | 4.47     | 0.14                |
|                         | Sulfadimethoxine      | SDM     | 39.41    | 0.88                |
|                         | Sulfamethazine        | SMZ     | 25.85    | 5.38                |
|                         | Sulfamethoxazole      | SMX     | 24.66    | 0.64                |
|                         | Sulfapyridine         | SPD     | 48.12    | 6.42                |
|                         | Sulfachloropyridazine |         | 28.50    | 4.48                |
| <b>Macrolides</b>       | Erythromycin          | ETM     | 7.47     |                     |
|                         | Erythromycin-H2O      | ETM-H2O | 33.18    | 7.66                |
|                         | Roxithromycin         | RTM     | 52.01    | 1.55                |
|                         | Clarithromycin        | CTM     | 48.56    | 2.83                |
|                         | Olendomycin-triacetat |         | 2.54     | 0.06                |
| <b>Fluoroquinolones</b> | Ciprofloxacin         | CFC     | 1.05     | 0.05                |
|                         | Enrofloxacin          | EFC     | 4.23     | 0.80                |
|                         | Norfloxacin           | NFC     | 0.69     | 0.22                |
|                         | Ofloxacin             | OFC     | 2.76     | 0.56                |
| <b>Tetracyclines</b>    | Chlortetracycline     | CTC     | 5.12     | 0.67                |
|                         | Oxytetracycline       | OTC     | 29.56    | 9.43                |
|                         | Tetracycline          | TCT     | 36.63    | 4.40                |
|                         | Doxycycline           | DCX     | 32.34    | 1.68                |
|                         | Meclocycline          |         | S/N < 10 | -                   |
| <b>Others</b>           | Trimethoprim          | TMP     | 69.15    | 0.40                |
|                         | Clindamycin           | CDC     | 62.12    | 1.50                |
